# Supplementary material
Source: PubMed Central journal article supplement (PMC3189857)

**Supplementary Figure 1 (a)** Plotted MFIs of CD25, Foxp3, IRF4, CTLA-4 and GITR on lymph node Foxp3<sup>+</sup> CD4<sup>+</sup> T cells from *Card11<sup>unm</sup>* or wild-type mice, measured by intracellular staining. **(b)** Frequency of Foxp3<sup>+</sup> cells among CD4<sup>+</sup>CD8<sup>-</sup> thymocytes from *Card11<sup>unm</sup>* or wild-type mice.

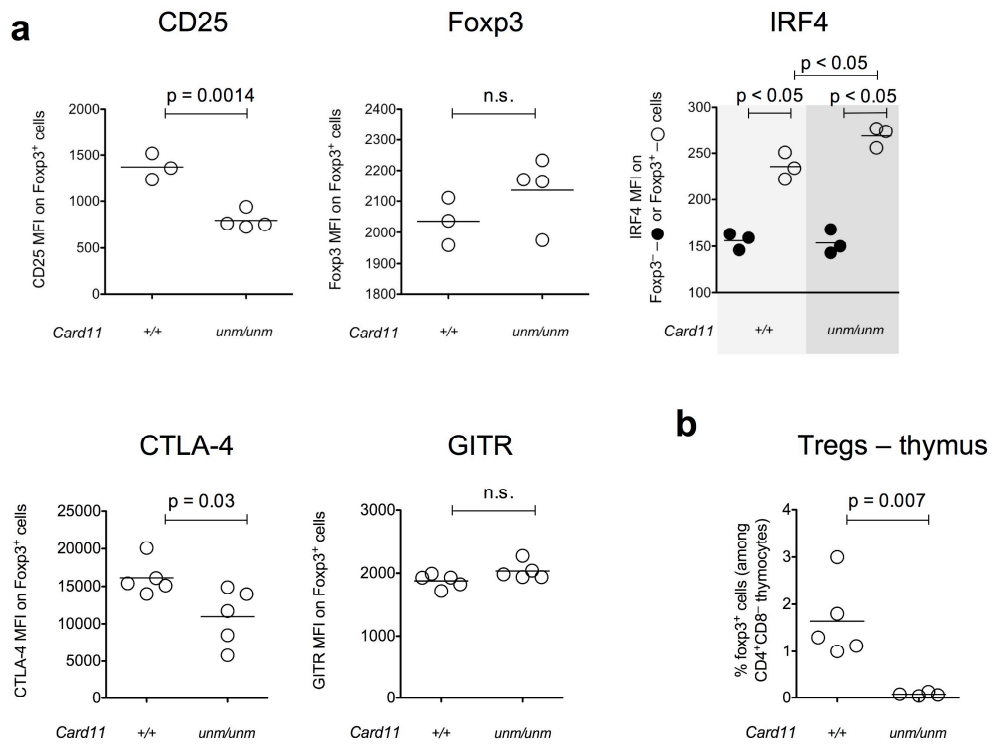

Supplement: NIHMS275291-supplement-1.pdf [file NIHMS275291-supplement-1.pdf]
