# Supplementary material
Source: PubMed Central journal article supplement (PMC3189857)

**Supplementary Figure 2** Expression of GATA3 on the CD44<sup>lo</sup>IL-4<sup>-</sup>, CD44<sup>hi</sup>IL-4<sup>-</sup> or CD44<sup>hi</sup>IL-4<sup>+</sup> CD4<sup>+</sup> T cell subsets (as indicated) from a *Card11<sup>umm</sup>* mouse, detected by *ex vivo* restimulation followed by intracellular cytokine staining.

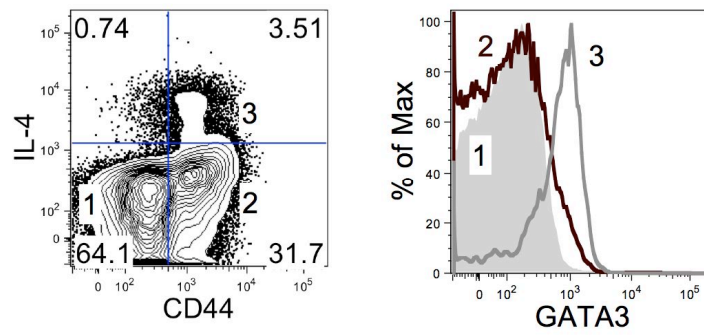

Supplement: NIHMS275291-supplement-2.pdf [file NIHMS275291-supplement-2.pdf]
