# Supplementary material
Source: PubMed Central journal article supplement (PMC3189857)

**Supplementary Figure 3** IL-4 production by CD4<sup>+</sup> T cells from non-transgenic or OT-II TCR transgenic *Card11<sup>unm</sup>* or control mice, detected by *ex vivo* restimulation followed by intracellular cytokine staining. Cells expressing the transgenic TCR are V $\beta$ 5<sup>+</sup>.

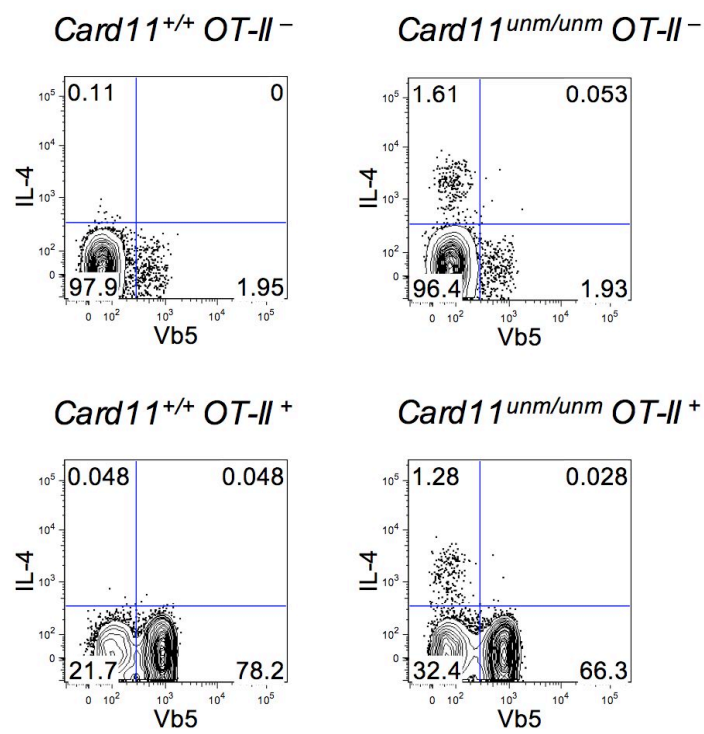

Supplement: NIHMS275291-supplement-3.pdf [file NIHMS275291-supplement-3.pdf]
