# Supplementary material
Source: PubMed Central journal article supplement (PMC3189857)

**Supplementary Figure 4** Reconstitution of the Foxp3<sup>+</sup> population in *Card11<sup>unm</sup>* mice following wild-type CD4<sup>+</sup> T cell transfer. Percentage of Foxp3<sup>+</sup> cells among lymph node CD4<sup>+</sup> T cells from *Card11<sup>unm</sup>* mice that were either untreated or injected i.v. with 10<sup>6</sup> sorted CD4<sup>+</sup> T cells from a Ly5a donor 10 weeks prior.

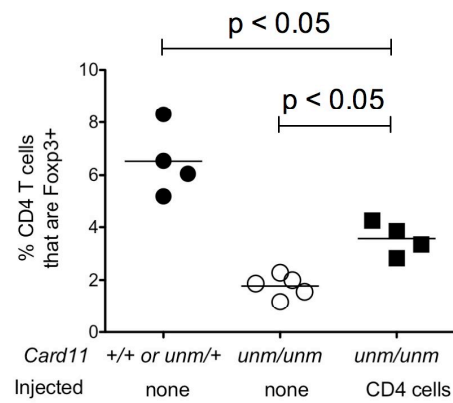

Supplement: NIHMS275291-supplement-4.pdf [file NIHMS275291-supplement-4.pdf]
