# Supplementary material
Source: PubMed Central journal article supplement (PMC3189857)

**Supplementary Figure 5 (a, b)** Dilution of CFSE and production of IFN $\gamma$  and IL-4 by wild-type or *Card11<sup>unm/unm</sup>* cells after culture of sorted naïve CD4<sup>+</sup> splenocytes under Th0, Th1 or Th2 polarising conditions for five days. **(c)** Dilution of CFSE and production of IL-17 by wild-type or *Card11<sup>unm/unm</sup>* cells after culture of sorted naïve CD4<sup>+</sup> splenocytes under Th0 or Th17 polarising conditions for three days. **(d)** Quantitation of the percentage of cytokine-producing cells at the endpoint of the Th1, Th2 or Th17 cultures (3 individual mice per genotype).

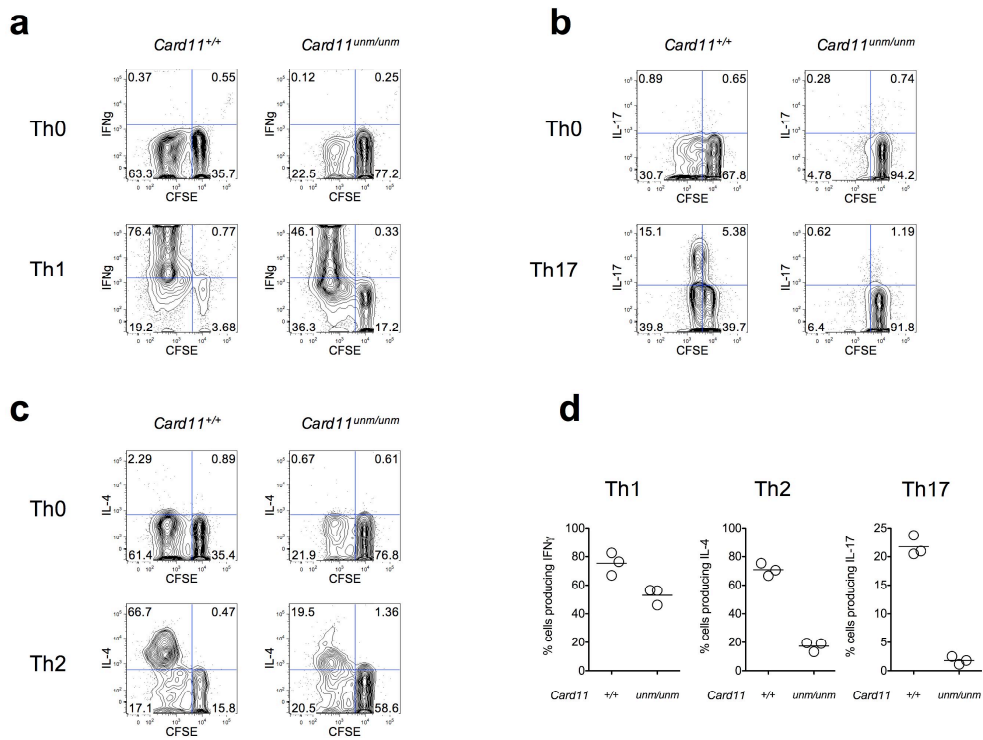

Supplement: NIHMS275291-supplement-5.pdf [file NIHMS275291-supplement-5.pdf]
